# Supplementary material for: Prophylactic low-dose, bi-weekly benznidazole treatment fails to prevent Trypanosoma cruzi infection in dogs under intense transmission pressure
Source: PubMed Central journal article supplement (PMC9648846; doi:10.1371/journal.pntd.0010688), 2022-10-31

Figure S1

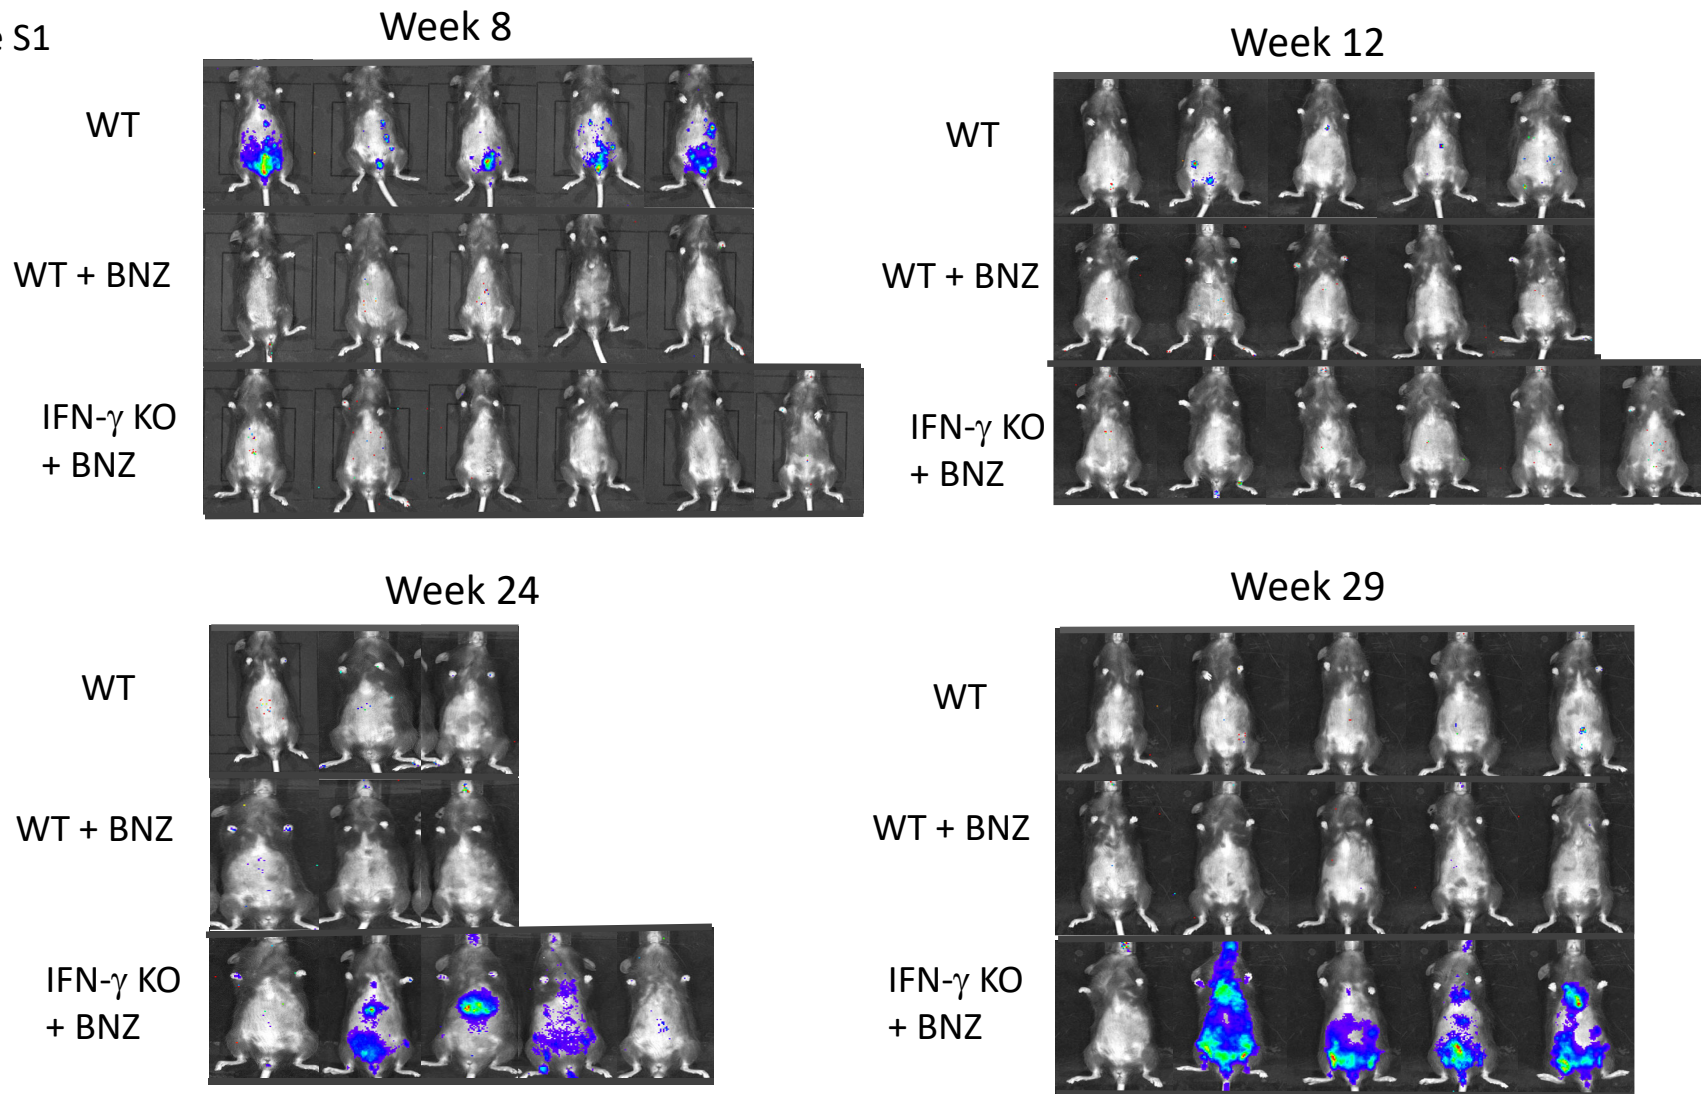

Supplement: pntd.0010688.s001.pdf [file pntd.0010688.s001.pdf]
